# Supplementary material for: Structural evolution, photoelectron spectra and vibrational properties of anionic GdGen− (n = 5–18) nanoalloy clusters: a DFT insight
Source: Royal Society of Chemistry journal article supplement (doi:10.1039/d2ra04037a), 2022-01-01
Supplement: d2ra04037a1.pdf [file d2ra04037a1.pdf]

**Supplementary Information**  
**Structural Evolution, Photoelectron Spectra and Vibrational Properties of**  
**Anionic GdGe<sub>n</sub><sup>-</sup> (*n*=5-18) Nanoalloy Clusters: A DFT Insight**

Zhaofeng Yang<sup>a</sup>, Aziz U Rehman<sup>a</sup>, Zhenzhu Cao<sup>a</sup>, Jucai Yang<sup>a,b\*</sup>

<sup>a</sup> School of Chemical Engineering, Inner Mongolia University of Technology, and Inner Mongolia Key Laboratory of Theoretical and Computational Chemistry Simulation, Hohhot 010051, Peoples Republic of China

<sup>b</sup> School of Energy and Power Engineering, Inner Mongolia University of Technology, Hohhot 010051, Peoples Republic of China

---

\*Jucai Yang E-mail: [yangjc@imut.edu.cn](mailto:yangjc@imut.edu.cn)

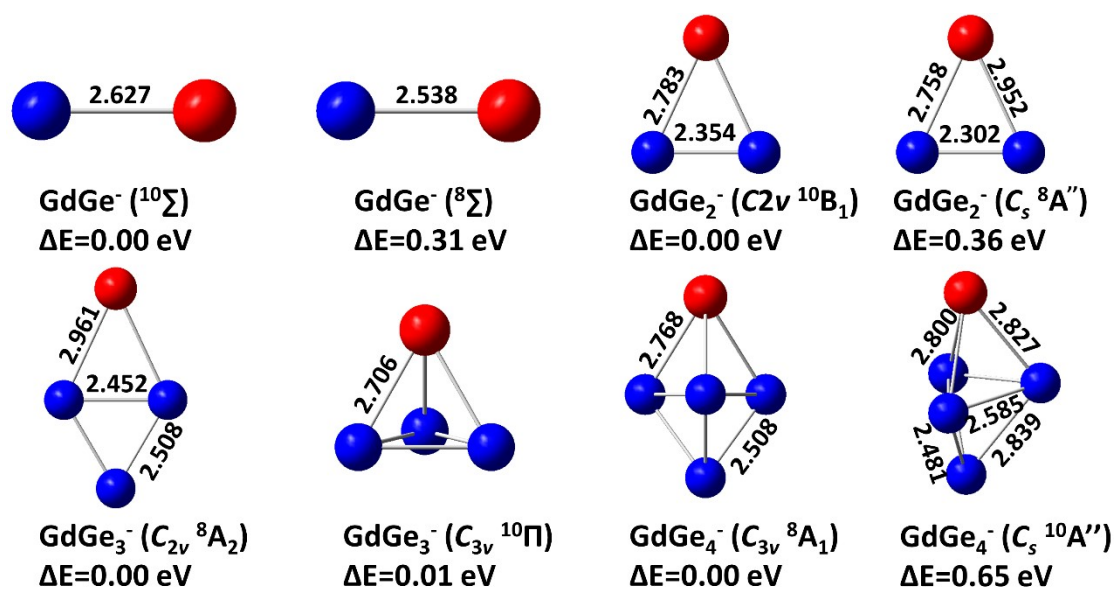

**Figure S1.** Lowest energy structure and isomers of  $\text{GdGe}_n^-$  ( $n=1-4$ ) anionic clusters, point group, electronic state and relative energy (in eV) calculated at mPW2PLYP/aug-cc-pVTZ,def2-TZVP//mPW2PLYP/cc-pVTZ-PP,def2-TZPV level. The blue and red circles stand for germanium and gadolinium atoms, respectively.

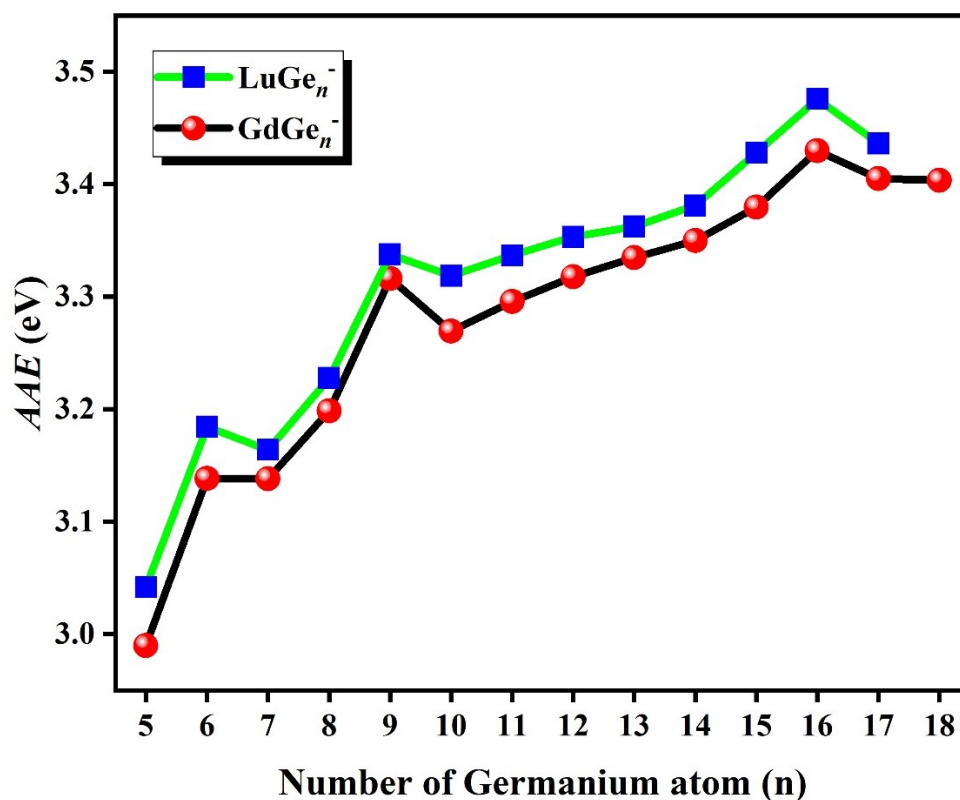

**Figure S2.** Size dependences of average atomization energy (AAE) for  $\text{GeGe}_n^-$  and  $\text{LuGe}_n^-$  ( $n=5-17$ ) clusters. The values of  $\text{LuGe}_n^-$  clusters are taken from Ref. 11.

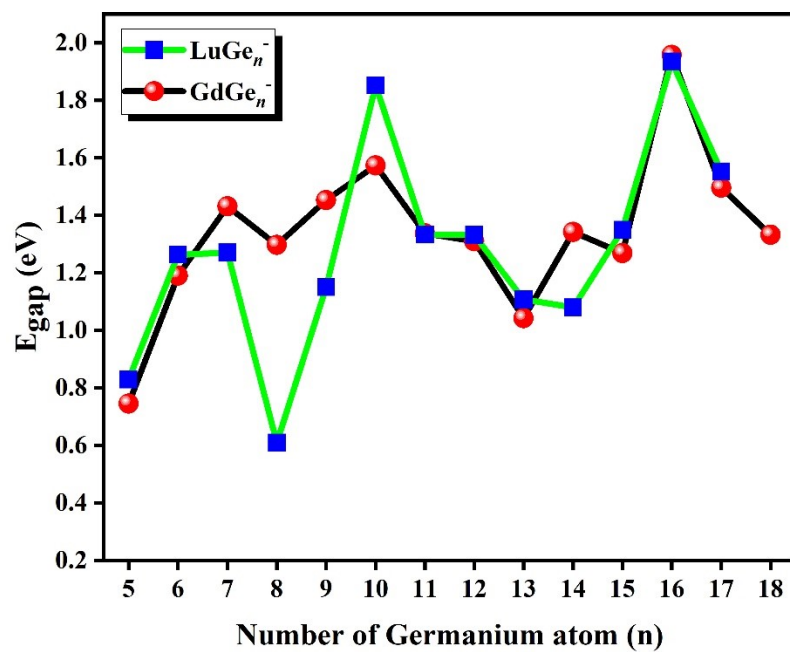

**Figure S3.** Size dependences of HOMO-LUMO energy gap ( $E_{\text{gap}}$ ) for  $\text{GeGe}_n^-$  and  $\text{LuGe}_n^-$  ( $n=5-17$ ) clusters. The values of  $\text{LuGe}_n^-$  clusters are taken from Ref. 11.

**Table S1.** Total energies (a.u.) of GdGe<sub>n</sub><sup>-</sup> (*n*=5-18) clusters in octuplet and decuplet calculated by using mPW2PLYP/(aug-cc-pVTZ,def2-TZVP)//mPW2PLYP/(cc-pVTZ-PP,def2-TZPV) scheme.

|             | State        |              |             | State               |              |
|-------------|--------------|--------------|-------------|---------------------|--------------|
| Isomer      | Octuplet     | Decuplet     | Isomer      | Octuplet            | Decuplet     |
| <b>5A1</b>  | -11148.59661 | -11148.54910 | <b>11A4</b> | -23609.02991        | -23609.00713 |
| <b>5A2</b>  | -11148.58321 | -11148.57607 | <b>12A1</b> | -25685.78992        | -25685.74058 |
| <b>6A1</b>  | -13225.35432 | -13225.31848 | <b>12A2</b> | -25685.78645        | -25685.72747 |
| <b>6A2</b>  | -13225.32490 | -13225.29891 | <b>12A3</b> | -25685.77560        | -25685.73268 |
| <b>6A3</b>  | -13225.31069 | -13225.31720 | <b>12A4</b> | -25685.77503        | -25685.75326 |
| <b>7A1</b>  | -15302.07925 | -15302.02559 | <b>13A1</b> | -27762.53028        | -27762.49715 |
| <b>7A2</b>  | -15302.07592 | -15302.03822 | <b>13A2</b> | -27762.52556        | -27762.48418 |
| <b>7A3</b>  | -15302.07234 | -15302.07213 | <b>13A3</b> | -27762.52522        | -27762.48141 |
| <b>7A4</b>  | -15302.06729 | -15302.01301 | <b>13A4</b> | -27762.51718        | -27762.45367 |
| <b>8A1</b>  | -17378.82419 | -17378.77772 | <b>14A1</b> | -29839.27081        | -29839.21985 |
| <b>8A2</b>  | -17378.82139 | -17378.79228 | <b>14A2</b> | -29839.26963        | -29839.21702 |
| <b>8A3</b>  | -17378.82024 | -17378.77767 | <b>14A3</b> | -29839.25949        | -29839.24956 |
| <b>8A4</b>  | -17378.81909 | -17378.80639 | <b>14A4</b> | -29839.24836        | -29839.22125 |
| <b>8A5</b>  | -17378.81196 | -17378.78227 | <b>15A1</b> | -31916.02109        | -31915.96955 |
| <b>9A1</b>  | -19455.59466 | -19455.53751 | <b>15A2</b> | -31916.01794        | -31915.96750 |
| <b>9A2</b>  | -19455.57832 | -19455.51909 | <b>15A3</b> | -31916.00826        | -31915.95910 |
| <b>9A3</b>  | -19455.57191 | -19455.51415 | <b>15A4</b> | -31916.00582        | -31915.96282 |
| <b>9A4</b>  | -19455.55727 | -19455.51576 | <b>16A1</b> | -33992.78627        | -33992.71106 |
| <b>10A1</b> | -21532.30723 | -21532.25069 | <b>16A2</b> | -33992.76593        | -33992.72447 |
| <b>10A2</b> | -21532.30063 | -21532.27283 | <b>16A3</b> | -33992.72899        | -33992.68894 |
| <b>10A3</b> | -21532.29482 | -21532.26481 | <b>17A1</b> | <b>-36069.50557</b> | -36069.44537 |
| <b>10A4</b> | -21532.27367 | -21532.26768 | <b>17A2</b> | <b>-36069.47500</b> | -36069.43183 |
| <b>11A1</b> | -23609.04865 | -23608.99830 | <b>18A1</b> | -38146.23920        | -38146.18444 |
| <b>11A2</b> | -23609.04476 | -23609.00664 | <b>18A2</b> | -38146.23532        | -38146.21333 |
| <b>11A3</b> | -23609.03997 | -23608.98703 |             |                     |              |

**Table S2.** Natural population analysis (NPA) charge (in a.u.), valence configuration, magnetic moment ( $\mu_B$ ) of  $6s$ ,  $4f$ ,  $5d$ ,  $6p$ , and total of Gd atom, and total magnetic moment of the global minima  $GdGe_n^-$  ( $n=5-18$ ) compounds calculated at the mPW2PLYP level.

| Compound      | Charge (a.u.) | Electron Configuration                        | Magnetic Moment of Gd Atom |      |      |      |       | Molecule ( $\mu_B$ ) |
|---------------|---------------|-----------------------------------------------|----------------------------|------|------|------|-------|----------------------|
|               |               |                                               | $6s$                       | $4f$ | $5d$ | $6p$ | Total |                      |
| $GdGe_5^-$    | 0.16          | [core] $6s^{0.81}4f^{7.00}5d^{1.71}6p^{0.32}$ | 0.01                       | 6.98 | 0.24 | 0.01 | 7.24  | 7                    |
| $GdGe_6^-$    | 0.25          | [core] $6s^{0.70}4f^{7.00}5d^{1.72}6p^{0.32}$ | 0.00                       | 6.98 | 0.24 | 0.00 | 7.22  | 7                    |
| $GdGe_7^-$    | 0.15          | [core] $6s^{0.57}4f^{7.00}5d^{2.03}6p^{0.25}$ | 0.03                       | 6.98 | 0.17 | 0.00 | 7.18  | 7                    |
| $GdGe_8^-$    | 0.15          | [core] $6s^{0.50}4f^{7.00}5d^{2.03}6p^{0.33}$ | 0.01                       | 6.98 | 0.25 | 0.01 | 7.25  | 7                    |
| $GdGe_9^-$    | 0.37          | [core] $6s^{0.57}4f^{7.00}5d^{1.83}6p^{0.26}$ | 0.02                       | 6.98 | 0.28 | 0.01 | 7.29  | 7                    |
| $GdGe_{10}^-$ | -0.02         | [core] $6s^{0.43}4f^{7.00}5d^{2.09}6p^{0.51}$ | 0.01                       | 6.98 | 0.23 | 0.01 | 7.23  | 7                    |
| $GdGe_{11}^-$ | 0.11          | [core] $6s^{0.39}4f^{7.00}5d^{1.85}6p^{0.65}$ | 0.01                       | 6.98 | 0.18 | 0.01 | 7.18  | 7                    |
| $GdGe_{12}^-$ | -0.26         | [core] $6s^{0.36}4f^{7.00}5d^{2.11}6p^{0.78}$ | 0.00                       | 6.98 | 0.17 | 0.01 | 7.16  | 7                    |
| $GdGe_{13}^-$ | -0.04         | [core] $6s^{0.46}4f^{7.00}5d^{2.10}6p^{0.49}$ | 0.01                       | 6.98 | 0.22 | 0.01 | 7.22  | 7                    |
| $GdGe_{14}^-$ | 0.25          | [core] $6s^{0.37}4f^{7.00}5d^{1.82}6p^{0.58}$ | 0.01                       | 6.97 | 0.18 | 0.02 | 7.18  | 7                    |
| $GdGe_{15}^-$ | -4.10         | [core] $6s^{0.46}4f^{7.00}5d^{1.83}6p^{1.77}$ | 0.00                       | 6.97 | 0.19 | 0.01 | 7.17  | 7                    |
| $GdGe_{16}^-$ | -4.87         | [core] $6s^{0.47}4f^{7.00}5d^{1.50}6p^{2.05}$ | 0.01                       | 6.97 | 0.20 | 0.01 | 7.19  | 7                    |
| $GdGe_{17}^-$ | -4.07         | [core] $6s^{0.44}4f^{6.99}5d^{1.84}6p^{1.76}$ | 0.00                       | 6.97 | 0.20 | 0.01 | 7.18  | 7                    |
| $GdGe_{18}^-$ | -3.17         | [core] $6s^{0.38}4f^{6.99}5d^{1.33}6p^{1.43}$ | 0.00                       | 6.97 | 0.19 | 0.01 | 7.17  | 7                    |
